# Supplementary material
Source: PubMed Central journal article supplement (PMC4897179)
Supplement: cr201648x2.pdf [file cr201648x2.pdf]

## Supplementary Figure - 2 Li

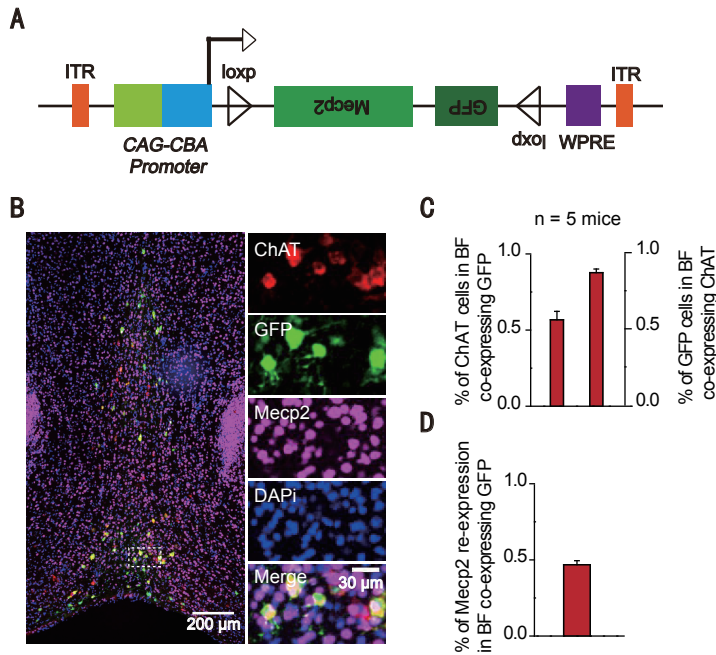

**Supplementary Figure 2. Systemic delivery of AAV8/Mecp2 into the BF of *Chat-Mecp2*<sup>-/-</sup> mice.** **A**, Schematic of the AAV8/Mecp2 viral construct. **B**, Fluorescence images showing BF sections of *Chat-Mecp2*<sup>-/-</sup>-AAV8/Mecp2 stained for the DAPI, MeCP2 and ChAT. Right: higher resolution images of the rectangular area. **C**, Percentage of ChAT-positive cells in BF co-expressing GFP and GFP-positive cells in BF co-expressing ChAT. **D**, Percentage of Mecp2 re-expression in BF GFP-positive neurons in *Chat-Mecp2*<sup>-/-</sup>-AAV8/Mecp2 mice. Error bars are means  $\pm$  s.e.m.
