# Supplementary material
Source: PubMed Central journal article supplement (PMC4897179)
Supplement: cr201648x3.pdf [file cr201648x3.pdf]

# Supplementary Figure - 3 Li

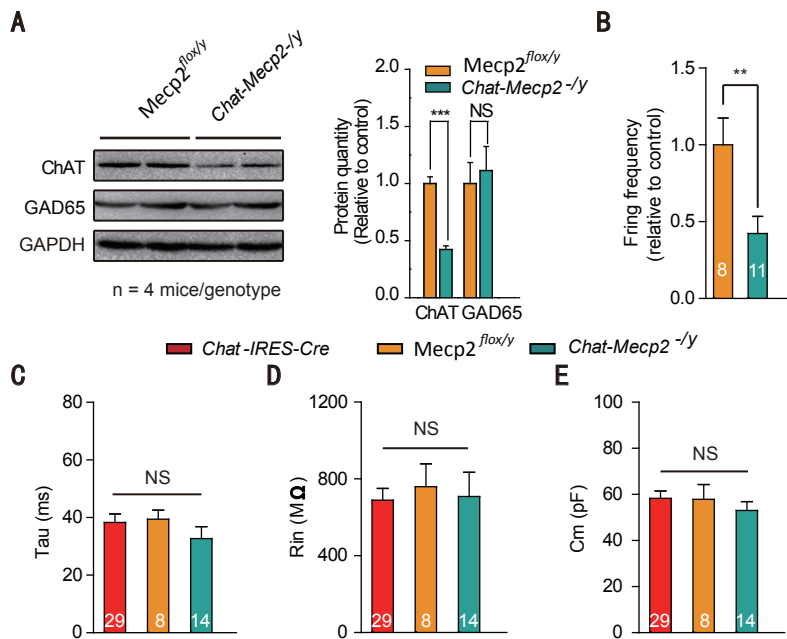

**Supplementary Figure 3. Protein analysis of the BF identified decreased expression of ChAT in *Chat-Mecp2<sup>-y</sup>* mice and reduced spontaneous firing of BF cholinergic neurons compared with *Mecp2<sup>fllox/y</sup>* mice.** **A**, Left: Immunoblotting of ChAT and GAD65 in BF extracts prepared from *Mecp2<sup>fllox/y</sup>* and *Chat-Mecp2<sup>-y</sup>* mice. Each lane was loaded with 40  $\mu$ g of protein, with GAPDH as the loading control, and normalized to *Mecp2<sup>fllox/y</sup>* levels. Right: Quantification of ChAT and GAD65 proteins in *Mecp2<sup>fllox/y</sup>* and *Chat-Mecp2<sup>-y</sup>* mice. **B**, Quantification of the firing frequency from BF cholinergic neurons in *Chat-Mecp2<sup>-y</sup>* mice normalized by *Mecp2<sup>fllox/y</sup>* mice. **(C-E)** Quantitative analysis of membrane time constant ( $\tau$ ), input resistance (Rin) and membrane capacitance (Cm) of cholinergic neurons in slices from *Chat-IRES-Cre*, *Mecp2<sup>fllox/y</sup>* and *Chat-Mecp2<sup>-y</sup>* mice. Error bars are means  $\pm$  s.e.m. *P*-values were calculated by one-way ANOVA with Tukey's post hoc comparison. \* *P* < 0.05, \*\* *P* < 0.01, \*\*\* *P* < 0.001.
