# Supplementary material
Source: PubMed Central journal article supplement (PMC4897179)
Supplement: cr201648x4.pdf [file cr201648x4.pdf]

# Supplementary Figure - 4 Li

**A**

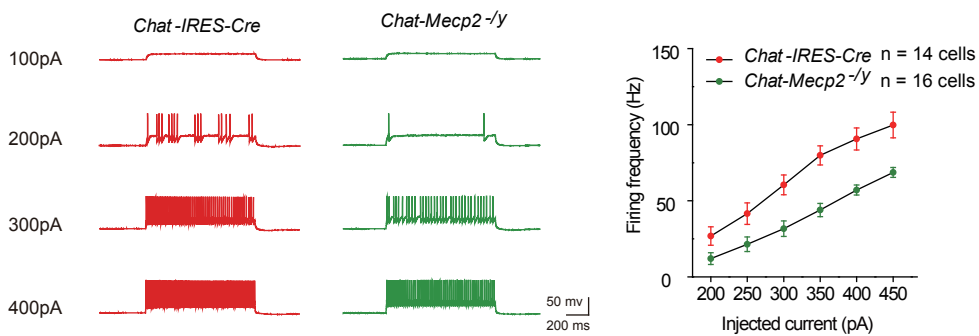

**B**

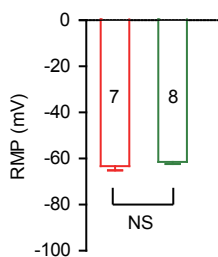

**C**

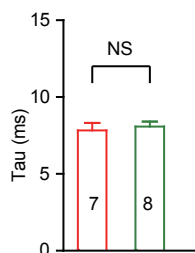

**D**

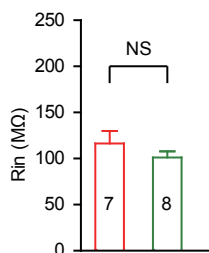

**E**

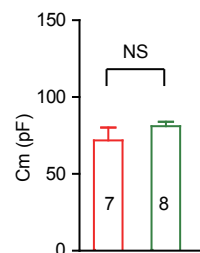

**F**

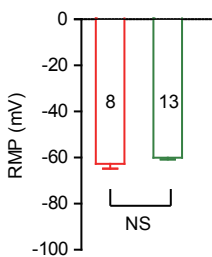

**G**

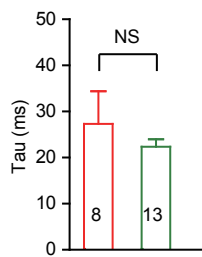

**H**

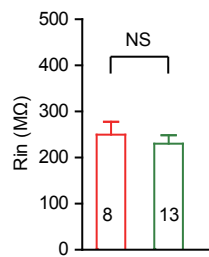

**I**

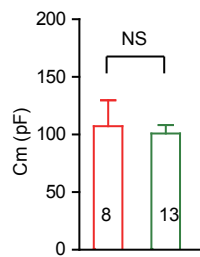

**Supplementary Figure 4. *Chat-Mecp2<sup>-/-</sup>* mice exhibited increased activity of PV interneurons in the hippocampus but no statistical difference in passive membrane properties either in PV interneurons or pyramidal neurons.** **A**, Left, Voltage responses to various current injection steps (1 s) in hippocampal PV interneurons from *Chat-IRES-Cre* and *Chat-Mecp2<sup>-/-</sup>* mice. Right, Plot of firing frequency in a train elicited in response to a 1 s suprathreshold current of 200 to 450 pA in *Chat-IRES-Cre* and *Chat-Mecp2<sup>-/-</sup>* mice. **(B-E)** Quantitative analysis of resting membrane potential (RMP), membrane time constant ( $\tau$ ), input resistance (Rin) and membrane capacitance (Cm) of PV interneurons in slices from *Chat-IRES-Cre* and *Chat-Mecp2<sup>-/-</sup>* mice. **(F-I)** Quantitative analysis of resting membrane potential (RMP), membrane time constant ( $\tau$ ), input resistance (Rin) and membrane capacitance (Cm) of pyramidal neurons in hippocampal slices from *Chat-IRES-Cre* and *Chat-Mecp2<sup>-/-</sup>* mice. *P*-values were calculated by two-sided t-test. Error bars are means  $\pm$  s.e.m.
