# Supplementary material
Source: PubMed Central journal article supplement (PMC4897179)
Supplement: cr201648x5.pdf [file cr201648x5.pdf]

## Supplementary Figure - 5 Li

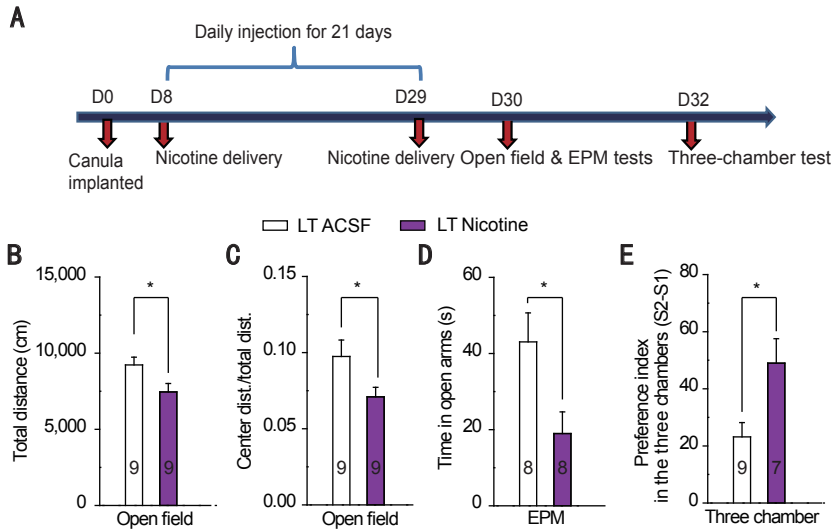

**Supplementary Figure 5. Long-term application of nicotine in the hippocampus resulted in increased anxiety and improved social memory in wt mice. A,** Schematic of the protocol. **B-D,** LT-nicotine mice travelled less distance and displayed decreased center-to-total distance ratio in the open field, and less time spent in the open arm of the EPM. **E,** In the third phase of the three-chamber test, LT-nicotine mice spent more time interacting with an unfamiliar stranger compared with that of the LT-ACSF mice. *P*-values were calculated by two-sided t-test. Error bars are means  $\pm$  s.e.m. \*  $P < 0.05$ .
